# Supplementary material for: Synthesis of Au/lignin–tannin particles and their anticancer application
Source: Royal Society of Chemistry journal article supplement (doi:10.1039/d1gc01119g), 2021-01-01
Supplement: d1gc01119g1.pdf [file d1gc01119g1.pdf]

## Supporting information

### Synthesis of Au/lignin-tannin particles and their anticancer application

Zhicheng Jiang, Jinjie Duan, Xingjie Guo, Ya Ma, Chunjiang Wang\*, Bi Shi\*

Table S1 Diameter of Au particles analyzed by XRD and TEM.

| Samples                              | Au/L <sub>1</sub> T <sub>0</sub> | Au/L <sub>0.75</sub> T <sub>0.25</sub> | Au/L <sub>0.5</sub> T <sub>0.5</sub> | Au/L <sub>0.25</sub> T <sub>0.75</sub> | Au/L <sub>0</sub> T <sub>1</sub> |
|--------------------------------------|----------------------------------|----------------------------------------|--------------------------------------|----------------------------------------|----------------------------------|
| Crystalline size <sub>XRD</sub> (nm) | -                                | 9.4                                    | 9.6                                  | 9.0                                    | 6.6                              |
| Particle size <sub>TEM</sub> (nm)    | 7.0                              | 13.2                                   | 13.0                                 | 12.4                                   | 7.1                              |

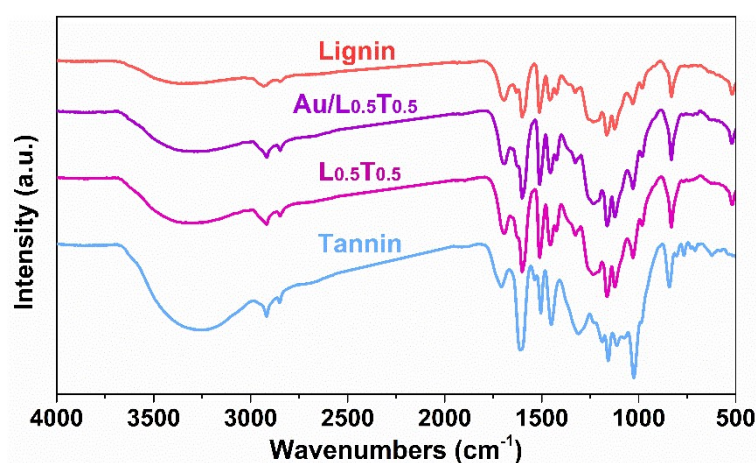

Fig. S1 FTIR spectra of the lignin/tannin fractions from solvothermal extraction and the LT particles.

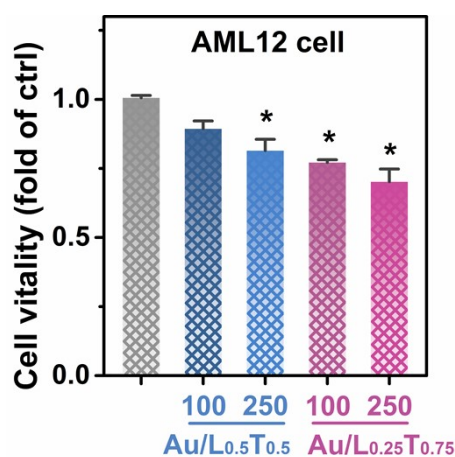

Fig. S2 The effects of Au/LT particles on the vitality of AML12 cells. AML12 cells were treated with Au/L<sub>0.5</sub>T<sub>0.5</sub> (100 µg/mL or 250 µg/mL) or Au/L<sub>0.25</sub>T<sub>0.75</sub> (100 µg/mL or 250 µg/mL) for 24 h and cell vitality was determined by Cell Counting Kit-8. n=4, \*P<0.05.
